# Supplementary material for: Online self-assessment of cardiovascular risk using the Joint British Societies (JBS3)-derived heart age tool: a descriptive study
Source: PubMed Central journal article supplement (PMC5051389; doi:10.1136/bmjopen-2016-011511), 2016-09-01
Supplement: bmjopen-2016-011511supp.pdf [file bmjopen-2016-011511supp.pdf]

## Supplementary Materials

**Title:** Online self-assessment of cardiovascular risk using the Joint British Societies (JBS3) derived heart age tool: A descriptive study

**Running Title:** Heart Age tool

Riyaz S. Patel, BHF Intermediate Fellow & Consultant Cardiologist, <sup>1,2</sup>

Catherine Lagord, Public Health Analyst, <sup>3</sup>

Jamie Waterall, NHS Health Check National Lead, <sup>3</sup>

Martin Moth, Digital Tools Lead NHS Choices, <sup>3</sup>

Mike Knapton, Associate Medical Director BHF, <sup>4</sup>

John E. Deanfield, BHF Professor of Cardiology and Director NCCPO. <sup>1,2</sup>

1. National Centre for Cardiovascular Prevention and Outcomes, Institute of Cardiovascular Sciences, University College London, 2nd Floor, 1 St Martin's-le-Grand, London EC1A 4NP, UK
2. Bart's Heart Centre, St Bartholomew's Hospital, West Smithfield, London, EC1A 7BE, UK
3. Public Health England, Skipton House, 80 London Road, London, SE1 6LH, UK
4. British Heart Foundation, 180 Hampstead Rd, London, NW1 7AW, UK

## Contents

|                                |    |
|--------------------------------|----|
| Supplementary Methods: .....   | 2  |
| Supplementary Figure S1: ..... | 3  |
| Supplementary Figure S2: ..... | 4  |
| Supplementary Figure S3 .....  | 5  |
| Supplementary Figure S4: ..... | 6  |
| Supplementary Figure S5 .....  | 7  |
| Supplementary Figure S6: ..... | 8  |
| Supplementary Table S1: .....  | 9  |
| Supplementary Table S2: .....  | 10 |
| Supplementary Table S3: .....  | 11 |

## Supplementary Methods:

Data items required for the heart age tool Based on QRisk

| Data item                                                                        | Default value                                                                  |
|----------------------------------------------------------------------------------|--------------------------------------------------------------------------------|
| Age                                                                              | 30                                                                             |
| Gender                                                                           | <i>Not applicable</i> : the tool does not proceed if a gender is not selected  |
| Ethnic group                                                                     | Not stated                                                                     |
| Townsend score                                                                   | National average                                                               |
| Indication of already having been diagnosed with cardiovascular disease (Yes/No) | <i>Not applicable</i> : the tool does not proceed if user does not select 'No' |
| Smoking status                                                                   | Not a smoker                                                                   |
| Height                                                                           | <i>Not applicable</i> : the tool does not proceed if a height is not entered   |
| Weight                                                                           | <i>Not applicable</i> : the tool does not proceed if a weight is not entered   |
| Total cholesterol level                                                          | National average for group with same age, sex and ethnicity                    |
| HDL level                                                                        | National average for group with same age, sex and ethnicity                    |
| Systolic blood pressure                                                          | National average for group with same age, sex and ethnicity                    |
| Indication of ever received blood pressure treatment (Yes/No)                    | <i>Not applicable</i> : the tool does not proceed if no option is selected     |
| Indication of having diabetes (Yes/No)                                           | <i>Not applicable</i> : the tool does not proceed if no option is selected     |
| Indication of having rheumatoid arthritis (Yes/No)                               | <i>Not applicable</i> : the tool does not proceed if no option is selected     |
| Indication of having chronic kidney disease (Yes/No)                             | <i>Not applicable</i> : the tool does not proceed if no option is selected     |
| Indication of atrial fibrillation (Yes/No)                                       | <i>Not applicable</i> : the tool does not proceed if no option is selected     |
| Indication of having close relative under 60 with CVD (Yes/No)                   | <i>Not applicable</i> : the tool does not proceed if no option is selected     |

Supplementary Figure S1: JBS3 heart age tool, website visitors by week

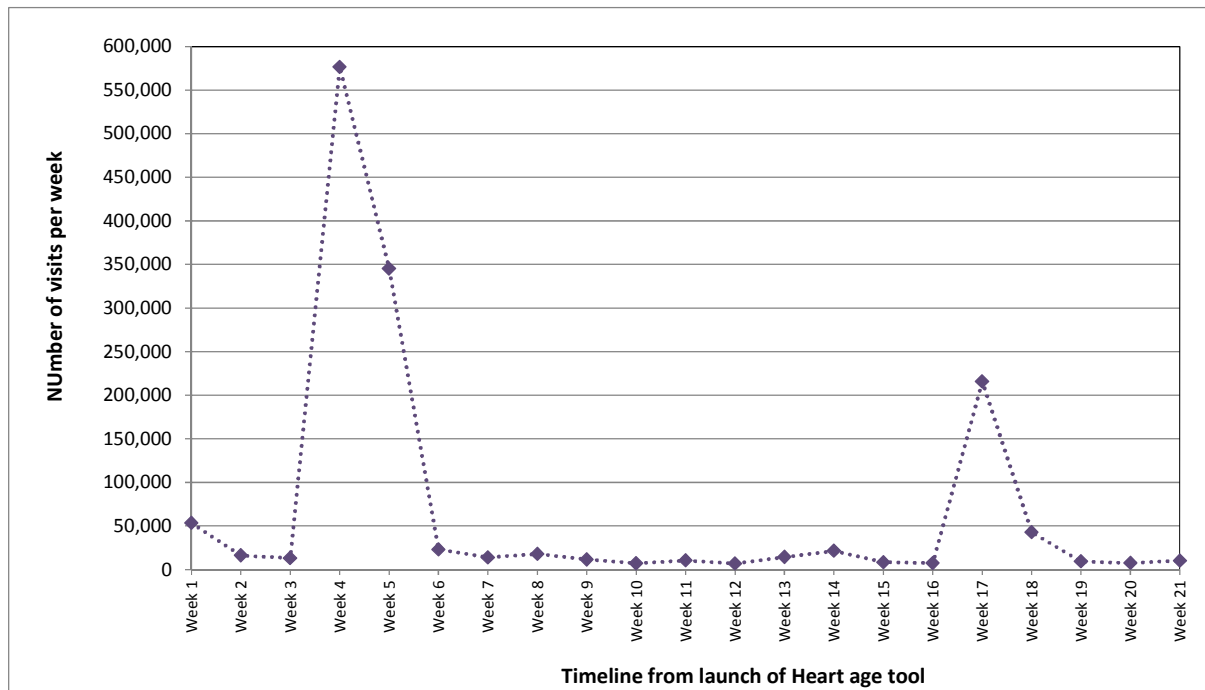

Figure demonstrating visits to the NHS choices website displaying the Heart Age tool by week. Peaks correspond to two major media coverage episodes.

Supplementary Figure S2: Gender profile of visitors completing the data journey

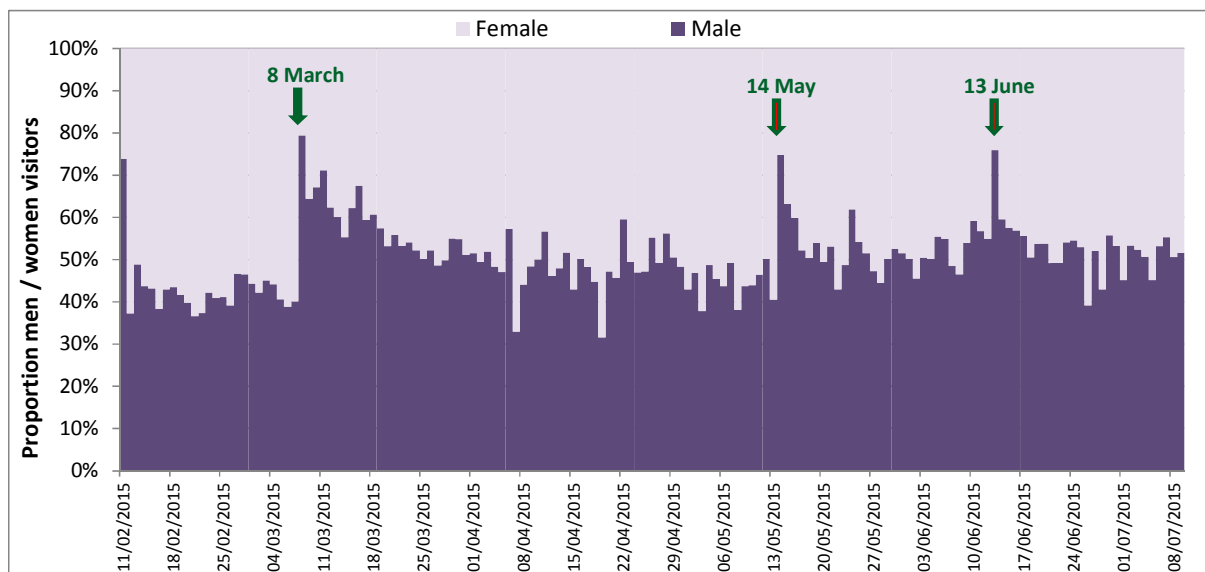

Figure illustrating changing proportion of male and female users, with shifts corresponding to media coverage (arrows).

**Supplementary Figure S3:** Users providing sufficient information to estimate a Townsend score

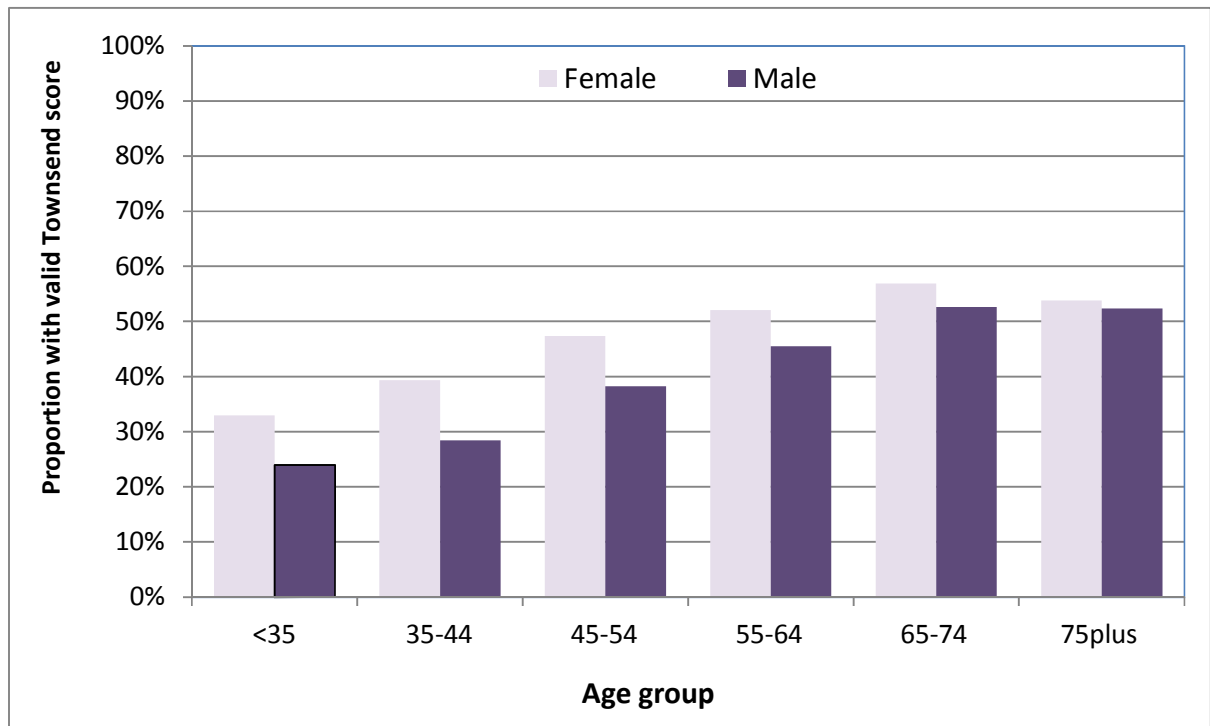

Proportion of visitors, by age and gender category who entered a valid England postcode permitting a Townsend score (deprivation index) to be calculated

Supplementary Figure S4: Height, Weight and BMI distributions compared to England population

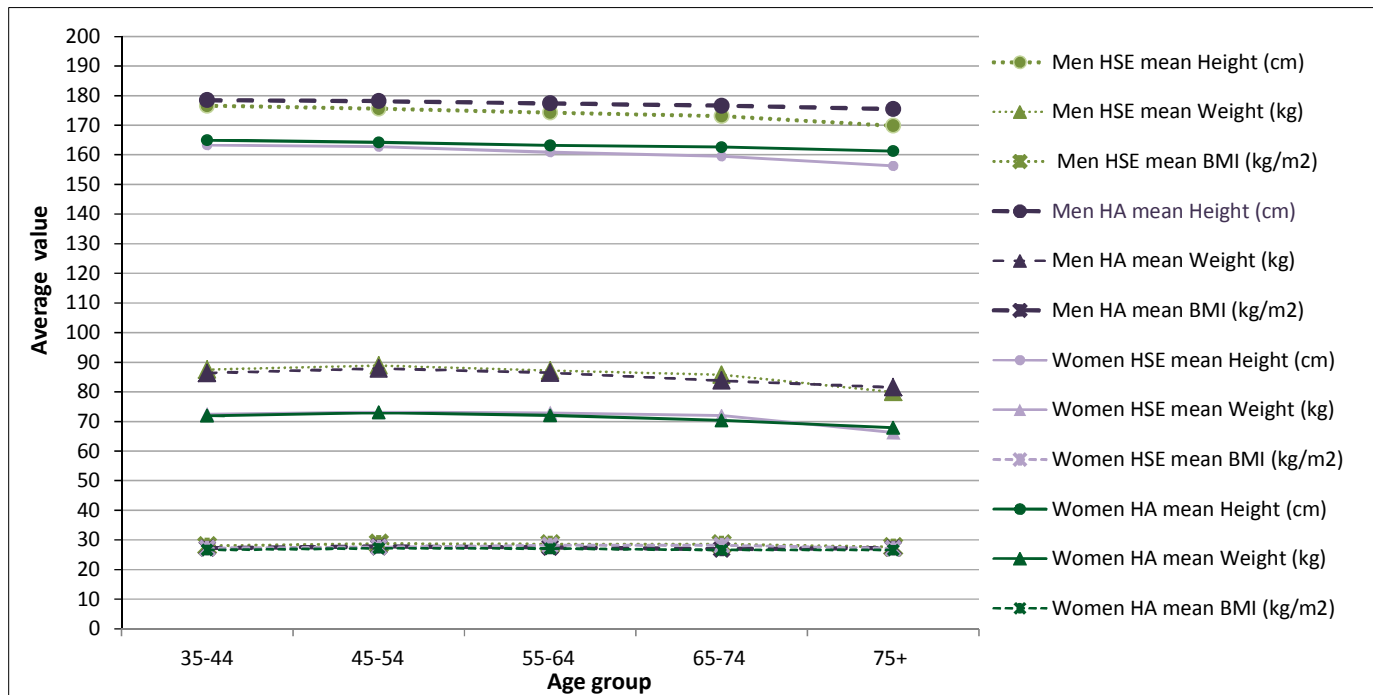

Figure illustrating distribution by age of height, weight and BMI for heart age (HA) tool users compared to data from Health Survey for England (HSE) 2013

**Supplementary Figure S5:** Total cholesterol values for Heart Age tool users compared to HSE survey data 2013, for men (Figure S5A) and women (Figure S5B)

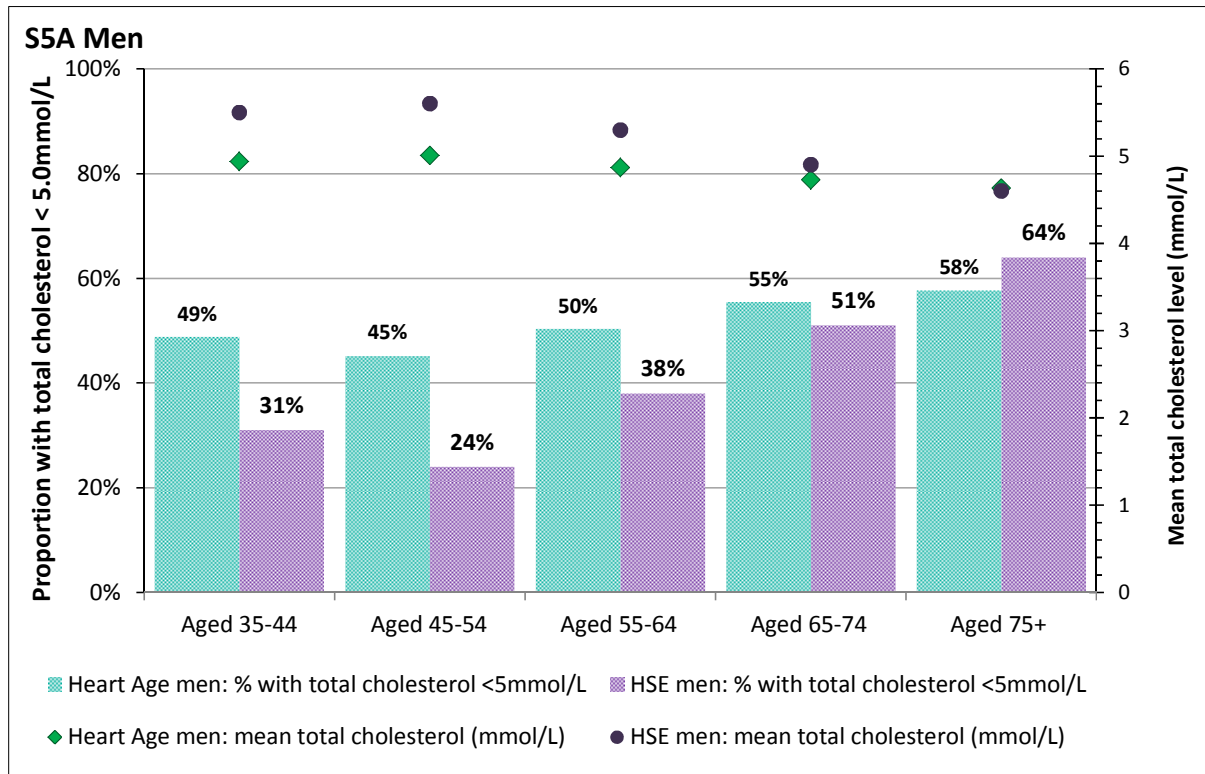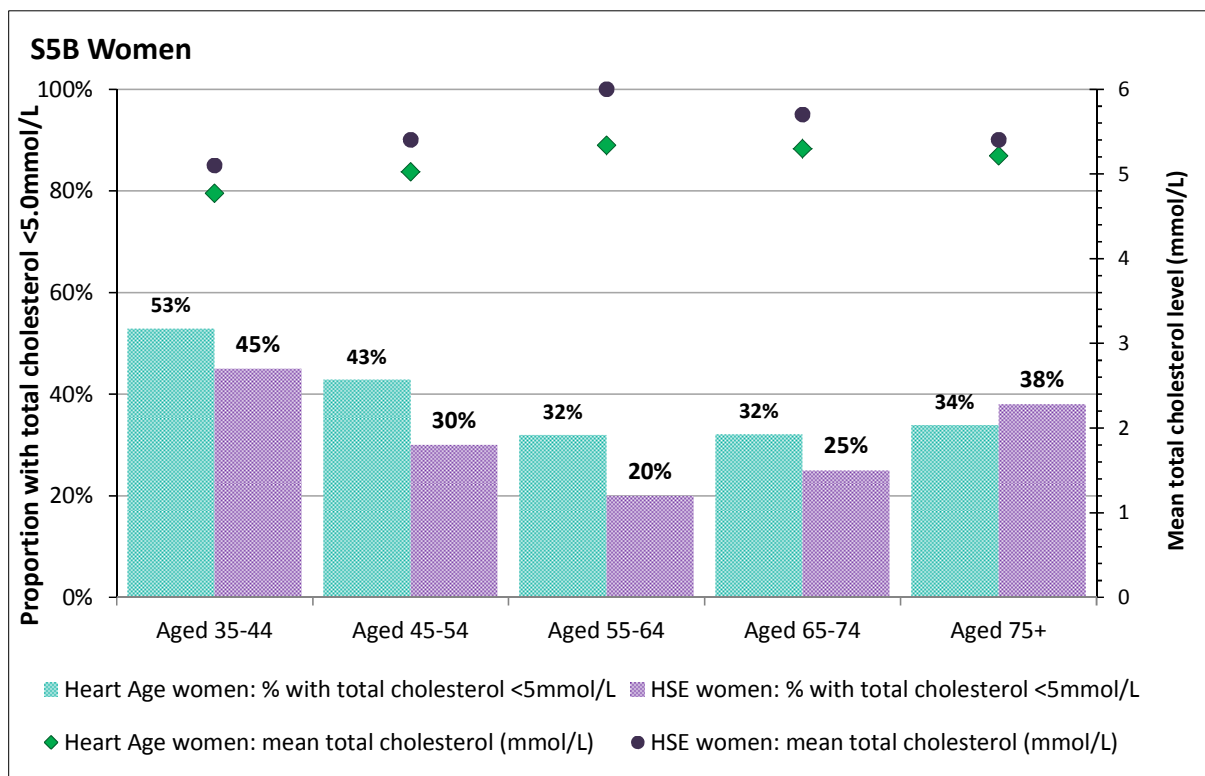

Figure illustrating distribution by age and gender for cholesterol values for heart age tool users reporting an England postcode compared to data from HSE

**Supplementary Figure S6:** Blood pressure values for Heart Age tool users compared to HSE survey data 2013 for men (Figure S6A) and women (Figure S6B)

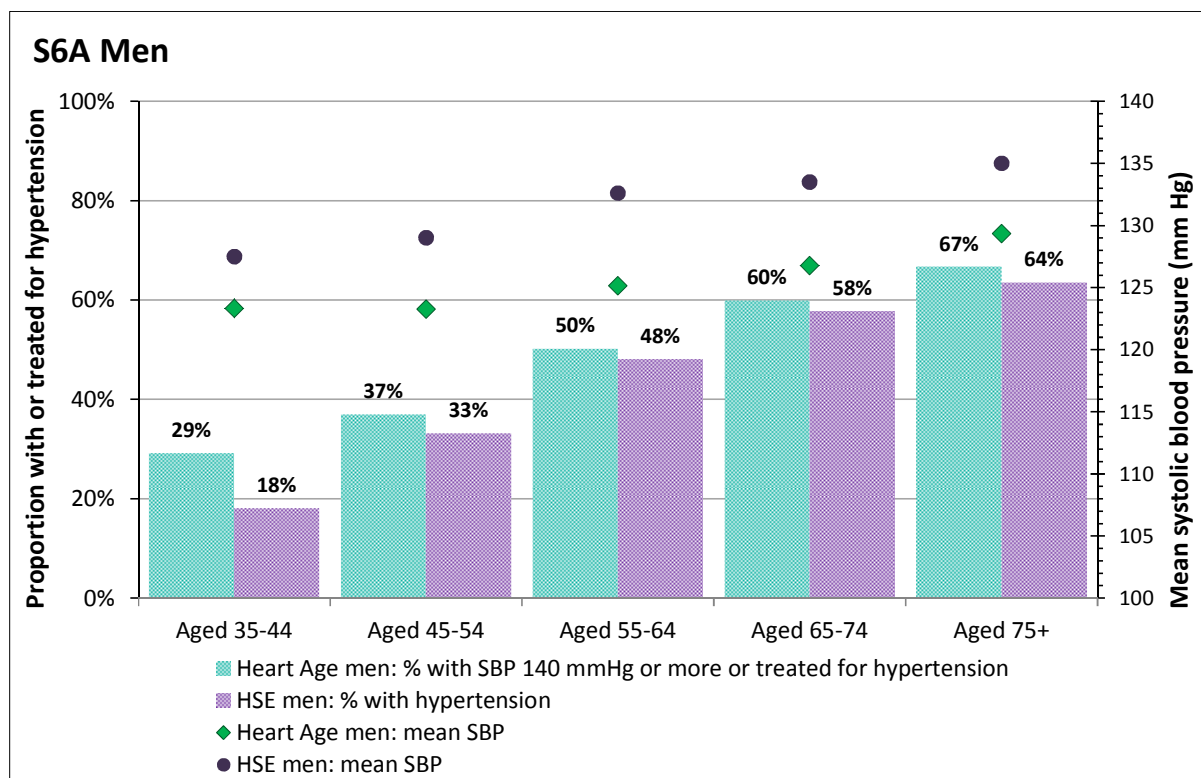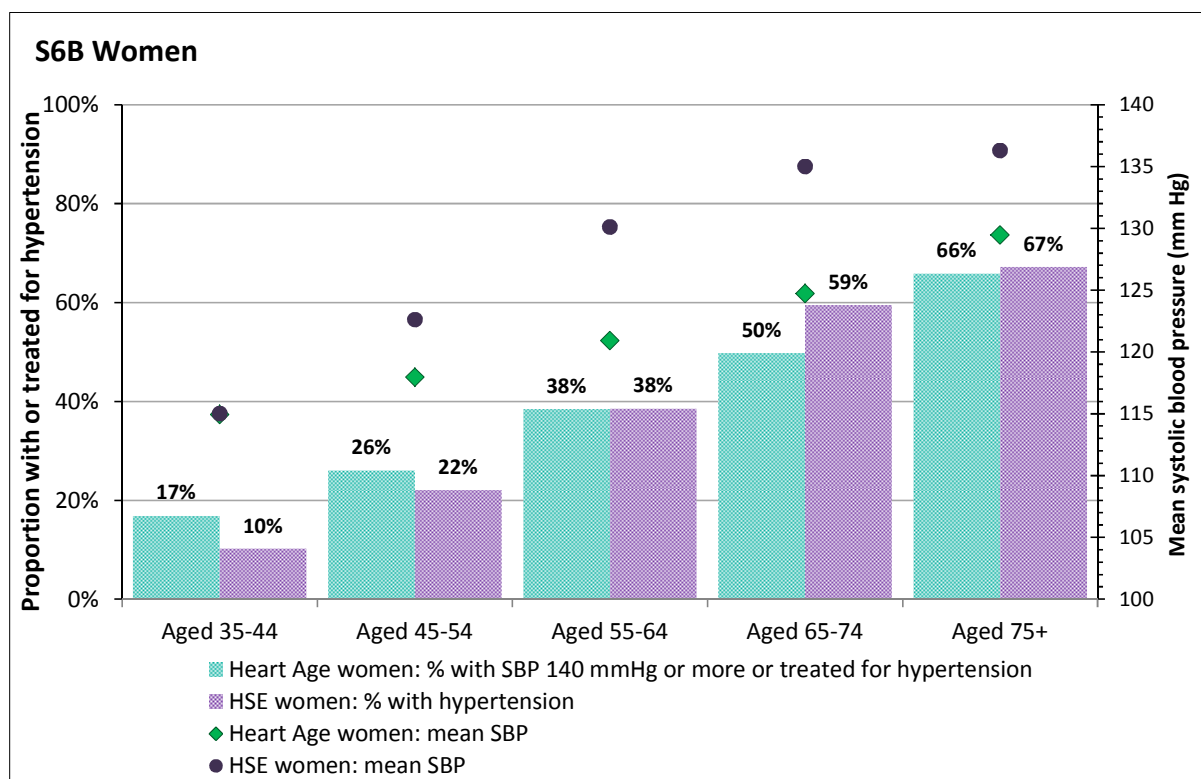

Figure illustrating distribution by age and gender for BP values for heart age tool users reporting an England postcode compared to data from HSE



**Supplementary Table S1:** Numbers of users completing the pathway and yielding a valid heart age

Sex and age profiles of the users completing the data journey and yielding a valid 'heart, age'

| <b>Age</b>               | <b>Women</b>   | <b>Men</b>     | <b>Total</b>   |
|--------------------------|----------------|----------------|----------------|
| 30 used as default value | 19,651         | 29,938         | 49,589         |
| 30-34                    | 29,032         | 46,770         | 75,802         |
| 35-39                    | 21,637         | 36,654         | 58,291         |
| 40-44                    | 28,681         | 43,470         | 72,151         |
| 45-49                    | 29,827         | 40,782         | 70,609         |
| 50-54                    | 30,621         | 39,667         | 70,288         |
| 55-59                    | 25,611         | 34,007         | 59,618         |
| 60-64                    | 20,207         | 28,980         | 49,187         |
| 65-69                    | 14,942         | 24,797         | 39,739         |
| 70-74                    | 6,494          | 12,660         | 19,154         |
| 75-79                    | 2,214          | 5,315          | 7,529          |
| 80-84                    | 711            | 1,839          | 2,550          |
| 85plus                   | 355            | 920            | 1,275          |
| <b>Total</b>             | <b>229,983</b> | <b>345,799</b> | <b>575,782</b> |

**Supplementary Table S2:** Prevalence of self-reported diseases by ethnic category

| Ethnicity           | Diabetes       |               |                 | Ethnicity           | Atrial fibrillation |               |                            |
|---------------------|----------------|---------------|-----------------|---------------------|---------------------|---------------|----------------------------|
|                     | no             | yes           | % with diabetes |                     | no                  | yes           | % with atrial fibrillation |
| Bangladeshi         | 1,055          | 130           | 11.0%           | Bangladeshi         | 1,135               | 50            | 4.2%                       |
| Black African       | 3,314          | 281           | 7.8%            | Black African       | 3,472               | 123           | 3.4%                       |
| Black Caribbean     | 2,116          | 194           | 8.4%            | Black Caribbean     | 2,225               | 85            | 3.7%                       |
| Chinese             | 5,702          | 324           | 5.4%            | Chinese             | 5,893               | 133           | 2.2%                       |
| Indian              | 17,375         | 1,795         | 9.4%            | Indian              | 18,951              | 219           | 1.1%                       |
| Other               | 20,561         | 931           | 4.3%            | Other               | 21,139              | 353           | 1.6%                       |
| Other Asian         | 15,723         | 782           | 4.7%            | Other Asian         | 16,273              | 232           | 1.4%                       |
| Pakistani           | 4,495          | 402           | 8.2%            | Pakistani           | 4,796               | 101           | 2.1%                       |
| White or not stated | 479,663        | 20,939        | 4.2%            | White or not stated | 486,998             | 13,604        | 2.7%                       |
| <b>ALL</b>          | <b>550,004</b> | <b>25,778</b> | <b>4.5%</b>     | <b>ALL</b>          | <b>560,882</b>      | <b>14,900</b> | <b>2.6%</b>                |

| Ethnicity           | Treated for high blood pressure |                |                                   | Ethnicity           | Kidney disease |              |                       |
|---------------------|---------------------------------|----------------|-----------------------------------|---------------------|----------------|--------------|-----------------------|
|                     | no                              | yes            | % treated for high blood pressure |                     | no             | yes          | % with kidney disease |
| Bangladeshi         | 1017                            | 168            | 14.2%                             | Bangladeshi         | 1,132          | 53           | 4.5%                  |
| Black African       | 2835                            | 760            | 21.1%                             | Black African       | 3,484          | 111          | 3.1%                  |
| Black Caribbean     | 1743                            | 567            | 24.5%                             | Black Caribbean     | 2,207          | 103          | 4.5%                  |
| Chinese             | 5065                            | 961            | 15.9%                             | Chinese             | 5,892          | 134          | 2.2%                  |
| Indian              | 15826                           | 3344           | 17.4%                             | Indian              | 18,910         | 260          | 1.4%                  |
| Other               | 17968                           | 3524           | 16.4%                             | Other               | 21,187         | 305          | 1.4%                  |
| Other Asian         | 13845                           | 2660           | 16.1%                             | Other Asian         | 16,191         | 314          | 1.9%                  |
| Pakistani           | 4217                            | 680            | 13.9%                             | Pakistani           | 4,803          | 94           | 1.9%                  |
| White or not stated | 406308                          | 94294          | 18.8%                             | White or not stated | 495,832        | 4,770        | 1.0%                  |
| <b>ALL</b>          | <b>468,824</b>                  | <b>106,958</b> | <b>18.6%</b>                      | <b>ALL</b>          | <b>569,638</b> | <b>6,144</b> | <b>1.1%</b>           |

| Ethnicity           | Rheumatoid arthritis |               |                             | Ethnicity           | Relative under 60 with CVD |               |                                     |
|---------------------|----------------------|---------------|-----------------------------|---------------------|----------------------------|---------------|-------------------------------------|
|                     | no                   | yes           | % with rheumatoid arthritis |                     | no                         | yes           | % have a relative under 60 with CVD |
| Bangladeshi         | 1,119                | 66            | 5.6%                        | Bangladeshi         | 864                        | 321           | 27.1%                               |
| Black African       | 3,417                | 178           | 5.0%                        | Black African       | 3105                       | 490           | 13.6%                               |
| Black Caribbean     | 2,185                | 125           | 5.4%                        | Black Caribbean     | 1982                       | 328           | 14.2%                               |
| Chinese             | 5,742                | 284           | 4.7%                        | Chinese             | 4995                       | 1031          | 17.1%                               |
| Indian              | 18,551               | 619           | 3.2%                        | Indian              | 14852                      | 4318          | 22.5%                               |
| Other               | 20,752               | 740           | 3.4%                        | Other               | 17348                      | 4144          | 19.3%                               |
| Other Asian         | 15,767               | 738           | 4.5%                        | Other Asian         | 13574                      | 2931          | 17.8%                               |
| Pakistani           | 4,717                | 180           | 3.7%                        | Pakistani           | 3538                       | 1359          | 27.8%                               |
| White or not stated | 486,287              | 14,315        | 2.9%                        | White or not stated | 422908                     | 77694         | 15.5%                               |
| <b>ALL</b>          | <b>558,537</b>       | <b>17,245</b> | <b>3.0%</b>                 | <b>ALL</b>          | <b>483,166</b>             | <b>92,616</b> | <b>16.1%</b>                        |

**Supplementary Table S3:** Cross-table showing Heart Age estimates by age groups - excluding users where the default value (30) was used for chronological age

| Heart age estimates by chronological age group |       | Heart age        |                   |                    |                    |                      |                        | Total   |
|------------------------------------------------|-------|------------------|-------------------|--------------------|--------------------|----------------------|------------------------|---------|
|                                                |       | Heart is younger | Heart is same age | 1 to 4 years older | 5 to 9 years older | 10 to 14 years older | 15 or more years older |         |
| Chronological age group                        | 30-39 | 6,963            | 28,868            | 73,541             | 22,545             | 1,487                | 689                    | 134,093 |
|                                                | 40-49 | 11,697           | 11,066            | 78,673             | 30,941             | 7,387                | 2,996                  | 142,760 |
|                                                | 50-59 | 13,616           | 7,315             | 56,352             | 29,973             | 13,261               | 9,389                  | 129,906 |
|                                                | 60-69 | 10,603           | 3,871             | 28,905             | 19,547             | 12,433               | 13,567                 | 88,926  |
|                                                | 70-79 | 3,235            | 1,134             | 5,981              | 4,949              | 3,498                | 7,886                  | 26,683  |
|                                                | 80-89 | 438              | 81                | 364                | 741                | 1,798                | 403                    | 3,825   |
| Total all chronological ages                   |       | 46,552           | 52,335            | 243,816            | 108,696            | 39,864               | 34,930                 | 526,193 |
